# Supplementary material
Source: publisher site journal article supplement (https://www.dovepress.com/article/464874)
Supplement: Supplementary file 1 [file get_supplementary_file.php]

**Supplementary Table 1: Details of Prospected sites along R. Naam in Mvolo County, Western Equatoria, South Sudan**

| **Site No.** | **Date** | **River** | **Site name** | **GPS reading** | **Altitude (m.)** | **Remarks*** |
| --- | --- | --- | --- | --- | --- | --- |
| **R.NAAM PROSPECTIONS** | | | | | | |
| 1 | 6/10/23 | Naam | Dombolo | Lat:6.06007; Long:29.95279 | 465 | No larvae found. Fast flowing stretch. |
| 2 | 6/10/23 | Naam | Domilara | Lat:6.05489; Long:29.9462 | 469 | No larvae/pupae. Rocks coated with algae. One fly caught. |
| 3 | 6/10/23 | Naam | Kpatiborokagba | Lat:6.05341; Long: 29.94885 | 485 | Trailing vegetation. Larvae +++; Pupae +++. |
| 4 | 6/10/23 | Naam | Main Bridge | Lat: 6.04698;Long: 29.95107 | 483 | No larvae or pupae found. Flies caught. |
| 5 | 6/10/23 | Naam | Kpagulobe | Lat:6.05217; Long: 29.94271 | 496 | Huge rocks with some sparse vegetation. Larvae++. Flies caught |
| 6 | 7/10/23 | Naam | Ninacross | Lat:6.0429;Long: 29.95056 | 485 | Slow flow of river. No larvae or pupa. |

*Indicate characteristics of a river, estimated length or depth, presence or absence of larvae/pupae. Density of immature stages: +=1-10; ++= 11-50; +++= >50
